# Supplementary material
Source: ML conference proceedings conference paper supplement (https://proceedings.mlr.press/v139/fu21d.html)
Supplement: Supplementary file 1 [file fu21d-supp.pdf]

---

# Supplementary Materials of Auto-NBA: Efficient and Effective Search Over The Joint Space of Networks, Bitwidths, and Accelerators

---

Yonggan Fu<sup>1</sup> Yongan Zhang<sup>1</sup> Yang Zhang<sup>2</sup> David Cox<sup>2</sup> Yingyan Lin<sup>1</sup>

## 1. Ablation studies about the accelerator search engine

As mentioned, the proposed accelerator search engine is one of the key enabler of our Auto-NBA framework. To evaluate its efficacy, we compare the acceleration efficiency of Auto-NBA generated accelerators with SOTA accelerators under the same datasets, models, and hardware resources. For FPGA-based accelerators, we consider three representative SOTA accelerators including (Qiu et al., 2016; Xiao et al., 2017; Zhang et al., 2018) for two DNN models (AlexNet and VGG16) on ImageNet. For a fair comparison, when using our own engine to generate optimal accelerators, we adopt the same precision and FPGA resource as the baselines. The results in Tab. 1 show that the Auto-NBA generated accelerators outperform **both SOTA expert-designed and tool-generated** accelerators under the same dataset, DNNs, and FPGA resources. For example, the Auto-NBA generated accelerators achieve up to 2.16 $\times$  improvement in throughput on VGG16. The consistent better performance of Auto-NBA’s automatically generated accelerators validates the effectiveness of our accelerator search engine in being able to navigate over the *large* and *discrete* design space of accelerators to efficiently identify/locate the optimal accelerators.

<sup>1</sup>Department of Electrical and Computer Engineering, Rice University <sup>2</sup>MIT-IBM Watson AI Lab. Correspondence to: Yingyan Lin <yingyan.lin@rice.edu>.

*Proceedings of the 38<sup>th</sup> International Conference on Machine Learning*, PMLR 139, 2021. Copyright 2021 by the author(s).

## References

- Qiu, J., Wang, J., Yao, S., Guo, K., Li, B., Zhou, E., Yu, J., Tang, T., Xu, N., Song, S., et al. Going deeper with embedded fpga platform for convolutional neural network. In *Proceedings of the 2016 ACM/SIGDA International Symposium on Field-Programmable Gate Arrays*, pp. 26–35. ACM, 2016.
- Xiao, Q., Liang, Y., Lu, L., Yan, S., and Tai, Y.-W. Exploring heterogeneous algorithms for accelerating deep convolutional neural networks on fpgas. In *Proceedings of the 54th Annual Design Automation Conference 2017, DAC ’17*, New York, NY, USA, 2017. Association for Computing Machinery. ISBN 9781450349277. doi: 10.1145/3061639.3062244. URL <https://doi.org/10.1145/3061639.3062244>.
- Zhang, X., Wang, J., Zhu, C., Lin, Y., Xiong, J., Hwu, W.-m., and Chen, D. Dnnbuilder: An automated tool for building high-performance dnn hardware accelerators for fpgas. In *Proceedings of the International Conference on Computer-Aided Design, ICCAD ’18*, New York, NY, USA, 2018. Association for Computing Machinery. ISBN 9781450359504. doi: 10.1145/3240765.3240801. URL <https://doi.org/10.1145/3240765.3240801>.

Table 1. Auto-NBA generated FPGA accelerators vs. SOTA FPGA accelerators built on top of an SOTA FPGA board, Zynq XC70Z45, adopting a frequency of 200 Mhz for different networks with a fixed precisio of 16-bit on ImageNet.

|                      | (Zhang et al., 2018) | (Xiao et al., 2017) | (Qiu et al., 2016) | Auto-NBA generated | (Zhang et al., 2018) | Auto-NBA generated |
|----------------------|----------------------|---------------------|--------------------|--------------------|----------------------|--------------------|
| Network              | VGG16                | VGG16               | VGG16              | VGG16              | AlexNet              | AlexNet            |
| Resource Utilization | 680/900 DSP          | 824/900 DSP         | 780/900 DSP        | 723/900 DSP        | 808/900 DSP          | 704/900 DSP        |
| Performance (GOP/s)  | 262                  | 230                 | 137                | <b>291</b>         | 247                  | <b>272</b>         |
